# Supplementary material
Source: PubMed Central journal article supplement (PMC6100803)
Supplement: NIHMS982785-supplement-2.pdf [file NIHMS982785-supplement-2.pdf]

## **Supplementary material**

### **Supplementary Method**

#### ***Thought probes***

We used a thought probe methodology (Seli, 2016, Smallwood *et al.*, 2004) to ask participants at the end of each block whether they were focused on the task (task-related thoughts) or were mind wandering with threat-related or no threat-related task-unrelated thoughts. A single form contained the following questions repeated 8 times (corresponding to one set of question for each of the 8 blocks of a sequence): 1) what were you thinking about just now? a) About the task you are doing at that exact moment, b) anxious thoughts, c) thinking about something unrelated?

Prior to starting the test, subjects were informed that they would have to report their dominant thoughts according to three categories: task-related thoughts, threat-related task-unrelated thoughts, or threat-unrelated task-unrelated thoughts. They were told that a task-related thought (TRT) was thinking about performing the task (choice a) above), a threat-related thought (threatTUTs) was thinking about the threat during the experiment (choice b) above). And a task-unrelated and threat-unrelated thought (nonthreatTUTs) was thinking about something else other than the task or the threat of shock (choice c) above). They were asked to make a single selection among the three choices.

#### ***Data analysis***

##### ***Signal-detection indexes***

Signal-detection sensitivity ( $d_L$ ) and response bias ( $C_L$ ) scores were calculated for each participant as described in (McVay and Kane, 2009) using the formulas for logistic distributions (Snodgrass and Corwin, 1988).

Anxiety & response inhibition

$d_L = \ln \{ [H(1-FA)] / [(1-H)FA] \}$ , and  $C_L = 0.5 [ \ln \{ [(1-FA)(1-H)] / [H(FA)] \} ]$ ,

where  $\ln$  = natural log,  $H$  =hit proportion, and  $FA$ =false-alarm proportion. Individual hit or false-alarm rates of 0 and 1 were adjusted by .01. A negative  $C_L$  reflects a go bias.

### ***Thought probes***

The three types of thought probes (TRTs, nonthreatTUTs, threatTUTs) were averaged separately within Task (no task, task) and Condition (safe, threat). Because of multicollinearity issues (the total thought scores equal 1 in each condition), each thought type was analyzed separately.

## **Supplementary Results**

### ***Performance in each anxiety disorder***

Supplementary Table S1 below shows the performance scores for each anxiety disorder. Visual observation of the scores shows similar pattern of responses among the three groups and this is confirmed by statistical analyses. We conducted a Group (GAD, GAD/SAD, SAD) x Condition (safe, threat) on each score that showed a significant group difference in the main analysis.

Results show no significant Group difference (Go correct hit,  $F(2,38)=.29$ , ns,  $\eta_p^2=.01$ ; Nogo correct omission,  $F(2,38)=.27$ , ns,  $\eta_p^2=.02$ ;  $C_L$ ,  $F(2,38)=.53$ , ns,  $\eta_p^2=.0007$ ; skill index,  $F(1,80)=.22$ , ns  $\eta_p^2=.001$ ).

**Supplementary Table S1.** Mean (SEM) performance scores for the healthy controls and the three anxiety disorder groups

|                                          | Controls        |                 | GAD             |                 | GAD/SAD         |                 | SAD             |                 |
|------------------------------------------|-----------------|-----------------|-----------------|-----------------|-----------------|-----------------|-----------------|-----------------|
|                                          | safe            | threat          | Safe            | threat          | safe            | threat          | safe            | threat          |
| <b>Nogo correct omission<sup>a</sup></b> | .76<br>(.02)    | .80<br>(.02)    | .73<br>(.02)    | .80<br>(.02)    | .77<br>(.02)    | .81<br>(.03)    | .78<br>(.03)    | .80<br>(.06)    |
| <b>Go correct hit<sup>b</sup></b>        | .91<br>(.01)    | .90<br>(.01)    | .84<br>(.02)    | .85<br>(.02)    | .87<br>(.02)    | .87<br>(.02)    | .89<br>(.02)    | .85<br>(.03)    |
| <b>Go RT (msec)<sup>c</sup></b>          | 387.8<br>(16.2) | 377.4<br>(14.7) | 317.1<br>(12.9) | 316.1<br>(14.4) | 345.9<br>(15.4) | 341.5<br>(16.7) | 353.0<br>(37.0) | 341.5<br>(16.7) |
| <b>Skill index<sup>d</sup></b>           | 2.05<br>(.07)   | 2.27<br>(.08)   | 2.36<br>(.11)   | 2.59<br>(.13)   | 2.29<br>(.10)   | 2.45<br>(.12)   | 2.30<br>(.19)   | 2.47<br>(.26)   |
| <b>CL<sup>e</sup></b>                    | -.63<br>(.11)   | -.53<br>(.11)   | -.43<br>(.12)   | -.25<br>(.18)   | -.48<br>(.09)   | -.18<br>(.15)   | -.47<br>(.13)   | -.12<br>(.23)   |
| <b>dL<sup>f</sup></b>                    | 3.98<br>(.24)   | 4.51<br>(.25)   | 2.98<br>(.29)   | 3.73<br>(.45)   | 3.56<br>(.31)   | 4.17<br>(.42)   | 3.58<br>(.13)   | 3.76<br>(.23)   |

<sup>a</sup> Nogo trials followed by no button press; <sup>b</sup> Go trials followed by button press; <sup>c</sup> RT to correct button press to go trials; <sup>d</sup>  $1000 * (\text{mean nogo accuracy ratio} / \text{mean go-trial RT})$  (Saucedo Marquez *et al.*, 2013, Seli, 2016, Seli *et al.*, 2016). <sup>e</sup> Response bias index. <sup>f</sup> Signal-detection sensitivity index.

### **Thought probes**

Thought types (TRTs, nonthreatTUTs, threatTUTs) are shown in Supplementary Table S2. They were analyzed separately using the same ANOVA as for the startle data. The result of this analysis is shown in Supplementary Table S3. In this section, we follow up on key effects that implicate group differences. The TRT data showed a Group x Condition interaction, reflecting reduced TRTs from the safe to the threat ( $F(1,40)=5.6, p=.02$ ) condition in the patients with no change in the control ( $F(1,40)=.1, ns$ ). As a result, the rate of TRTs was the same in the two groups in the safe condition ( $F(1,80)=1.2$ ) but it was lower in the patients compared to the controls in the threat condition ( $F(1,80)=12.6, p<.0009$ ). For threatTUT, there was a group main effect, due to higher overall rates of threatTUTs in the patients compared to the controls.

**Supplementary Table S2.** Mean (SEM) of rates of each thought types

| Tasks        | Thought types             | Controls  |           | Patients  |           |
|--------------|---------------------------|-----------|-----------|-----------|-----------|
|              |                           | Safe      | Threat    | Safe      | Threat    |
| Control task | TRTs <sup>a</sup>         | .28 (.05) | .33 (.05) | .25 (.04) | .15 (.03) |
|              | nothreatTUTs <sup>b</sup> | .67 (.06) | .40 (.05) | .66 (.04) | .39 (.05) |
|              | ThreatTUTs <sup>c</sup>   | .05 (.02) | .27 (.05) | .09 (.03) | .46 (.05) |
| GNG          | TRTs                      | .57 (.05) | .62 (.05) | .48 (.06) | .41 (.05) |
|              | nothreatTUTs              | .39 (.04) | .19 (.04) | .42 (.05) | .23 (.04) |
|              | ThreatTUTs                | .04 (.02) | .19 (.04) | .10 (.03) | .36 (.05) |

<sup>a</sup>Task-related thoughts; <sup>b</sup> no threat-related/task-unrelated thoughts; <sup>c</sup> Threat-related/task-unrelated thoughts.

**Supplementary Table S3.** Statistical analysis (ANOVAs) of thought probes

|                                 | TRTs                                   | threatTUTs                             | nothreatTUTs                           |
|---------------------------------|----------------------------------------|----------------------------------------|----------------------------------------|
| <b>Group</b>                    | F(1,80)=6.1, p=.01, $\eta_p^2=.078$    | F(1,80)=9.7, p=.003, $\eta_p^2=.108$   | F(1,80)=.4, ns                         |
| <b>Condition</b>                | F(1,80)=.5, ns                         | F(1,80)=51.6, p<.0009, $\eta_p^2=.392$ | F(1,80)=38.8, p<.0009, $\eta_p^2=.331$ |
| <b>Task</b>                     | F(1,80)=65.0, p<.0009, $\eta_p^2=.452$ | F(1,80)=5.9, p=.02, $\eta_p^2=.069$    | F(1,80)=33.2, p<.0009, $\eta_p^2=.297$ |
| <b>Group x Condition</b>        | F(1,64)=8.2, p=.005, $\eta_p^2=.088$   | F(1,80)=3.4, p=.069, $\eta_p^2=.046$   | F(1,80)=.5, ns                         |
| <b>Group x Task</b>             | F(1,80)=.4, ns                         | F(1,80)=.03, ns                        | F(1,80)=.5, ns                         |
| <b>Condition x task</b>         | F(1,80)=.1, ns                         | F(1,80)=6.7, p=.01, $\eta_p^2=.077$    | F(1,80)=1.4, ns                        |
| <b>Group x Condition x task</b> | F(1,80)=.1, ns                         | F(1,80)=.1, ns                         | F(1,80)=.9, ns                         |

### Startle

The startle data, expressed in T-scores, are shown in Supplementary Fig. S1. These data were analyzed with a group (comparisons, patients) x task (control task, GNG) x condition (safe, threat) ANOVA. As expected, startle magnitude was larger in the threat compared to the safe condition (F(1,80)=238.7, p<.0009,  $\eta_p^2=.749$ ), but this effect was qualified by a group x

## Anxiety & response inhibition

condition interaction ( $F(1,80)=5.2$ ,  $p=.02$ ,  $\eta_p^2=.661$ ), reflecting greater increased in startle magnitude from the safe to the threat condition (i.e., fear-potentiated startle) in the patients compared to the comparisons. Startle was also reduced during the GNG task compared to the no task ( $F(1,80)=23.3$ ,  $p<.0009$ ,  $\eta_p^2=.225$ ), and startle potentiation tended to be smaller during the GNG task compared to the no task (task x Threat:  $F(1,80)=3.5$ ,  $p=.06$ ,  $\eta_p^2=.042$ ). There was no other significant effect (all  $p>.1$ ).

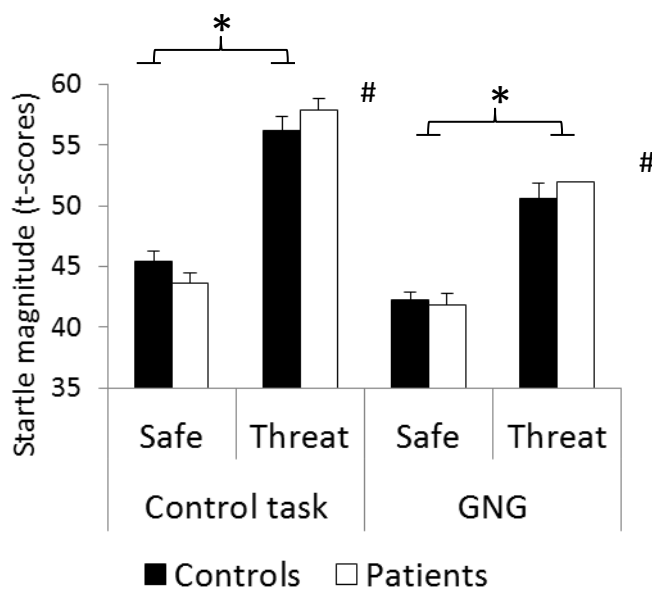

**Supplementary Fig. S1.** Startle magnitude (T-scores) in each condition in the two groups. Error bars are sem. \* for a significant ( $p<.05$ ) overall difference between the safe and the threat conditions; # for significant ( $p<.05$ ) greater startle potentiation in the patients compared to the control group.

### Supplementary References

- McVay, J. C. & Kane, M. J.** (2009). Conducting the train of thought: Working memory capacity, goal neglect, and mind wandering in an executive-control task. *Journal of experimental psychology. Learning, memory, and cognition* **35**, 196-204.
- Saucedo Marquez, C. M., Zhang, X., Swinnen, S. P., Meesen, R. & Wenderoth, N.** (2013). Task-specific effect of transcranial direct current stimulation on motor learning. *Frontiers in Human Neuroscience* **7**.
- Seli, P.** (2016). The Attention-Lapse and Motor Decoupling accounts of SART performance are not mutually exclusive. *Consciousness and Cognition* **41**, 189-198.
- Seli, P., Risko, E. F. & Smilek, D.** (2016). On the Necessity of Distinguishing Between Unintentional and Intentional Mind Wandering. *Psychological Science* **27**, 685-691.
- Smallwood, J., Davies, J. B., Heim, D., Finnigan, F., Sudberry, M., O'Connor, R. & Obonsawin, M.** (2004). Subjective experience and the attentional lapse: Task engagement and disengagement during sustained attention. *Consciousness and Cognition* **13**, 657-690.
- Snodgrass, J. G. & Corwin, J.** (1988). Pragmatics of measuring recognition memory: Applications to dementia and amnesia. *Journal of Experimental Psychology: General* **117**, 34-50.
